# Supplementary material for: Biodiversity Promotes Tree Growth during Succession in Subtropical Forest
Source: PubMed Central journal article supplement (PMC3841117; doi:10.1371/journal.pone.0081246), 2013-11-26

Table S1: Family, genus, and species names of individuals in the canopy tree (d>10 cm) cohort. The number of individuals listed refers to all 25 study plots, i.e. to a total ground area of 22'500 m<sup>2</sup>.

| Family           | Genus           | Species              | Individuals |
|------------------|-----------------|----------------------|-------------|
| Aceraceae        | Acer            | <i>amplum</i>        | 1           |
| Aceraceae        | Acer            | <i>cordatum</i>      | 1           |
| Alangiaceae      | Alangium        | <i>kurzii</i>        | 3           |
| Anacardiaceae    | Toxicodendron   | <i>succedaneum</i>   | 13          |
| Aquifoliaceae    | Ilex            | <i>chinensis</i>     | 7           |
| Aquifoliaceae    | Ilex            | <i>micrococca</i>    | 3           |
| Aquifoliaceae    | Ilex            | <i>rotunda</i>       | 1           |
| Araliaceae       | Dendropanax     | <i>dentiger</i>      | 3           |
| Betulaceae       | Carpinus        | <i>viminea</i>       | 3           |
| Daphniphyllaceae | Daphniphyllum   | <i>oldhamii</i>      | 69          |
| Ebenaceae        | Diospyros       | <i>glaucofolia</i>   | 7           |
| Elaeocarpaceae   | Elaeocarpus     | <i>chinensis</i>     | 4           |
| Elaeocarpaceae   | Elaeocarpus     | <i>decipiens</i>     | 6           |
| Elaeocarpaceae   | Elaeocarpus     | <i>japonicus</i>     | 1           |
| Ericaceae        | Rhododendron    | <i>latouchea</i>     | 2           |
| Ericaceae        | Rhododendron    | <i>ovatum</i>        | 1           |
| Ericaceae        | Vaccinium       | <i>carlesii</i>      | 1           |
| Euphorbiaceae    | Sapium          | <i>japonicum</i>     | 1           |
| Fabaceae         | Albizia         | <i>kalkora</i>       | 17          |
| Fabaceae         | Dalbergia       | <i>hupeana</i>       | 5           |
| Fagaceae         | Castanea        | <i>henryi</i>        | 20          |
| Fagaceae         | Castanopsis     | <i>carlesii</i>      | 26          |
| Fagaceae         | Castanopsis     | <i>eyrei</i>         | 354         |
| Fagaceae         | Castanopsis     | <i>fargesii</i>      | 43          |
| Fagaceae         | Castanopsis     | <i>sclerophylla</i>  | 14          |
| Fagaceae         | Castanopsis     | <i>tibetana</i>      | 3           |
| Fagaceae         | Cyclobalanopsis | <i>glauca</i>        | 18          |
| Fagaceae         | Cyclobalanopsis | <i>myrsinaefolia</i> | 37          |
| Fagaceae         | Cyclobalanopsis | <i>stewardiana</i>   | 4           |
| Fagaceae         | Lithocarpus     | <i>glaber</i>        | 89          |
| Fagaceae         | Quercus         | <i>phillyreoides</i> | 6           |
| Fagaceae         | Quercus         | <i>serrata</i>       | 49          |
| Hamamelidaceae   | Liquidambar     | <i>formosana</i>     | 4           |
| Hamamelidaceae   | Loropetalum     | <i>chinense</i>      | 10          |

(continued next page)

(Table S1, continued)

|               |              |                      |     |
|---------------|--------------|----------------------|-----|
| Lauraceae     | Cinnamomum   | <i>subavenum</i>     | 2   |
| Lauraceae     | Litsea       | <i>coreana</i>       | 1   |
| Lauraceae     | Machilus     | <i>leptophylla</i>   | 1   |
| Lauraceae     | Machilus     | <i>thunbergii</i>    | 24  |
| Lauraceae     | Neolitsea    | <i>aurata</i>        | 2   |
| Lauraceae     | Sassafras    | <i>tzumu</i>         | 1   |
| Myricaceae    | Myrica       | <i>rubra</i>         | 40  |
| Myrtaceae     | Syzygium     | <i>buxifolium</i>    | 2   |
| Nyssaceae     | Nyssa        | <i>sinensis</i>      | 3   |
| Oleaceae      | Fraxinus     | <i>insularis</i>     | 4   |
| Oleaceae      | Osmanthus    | <i>cooperi</i>       | 1   |
| Pinaceae      | Pinus        | <i>massoniana</i>    | 210 |
| Pinaceae      | Pinus        | <i>taiwanensis</i>   | 34  |
| Rosaceae      | Laurocerasus | <i>spinulosa</i>     | 1   |
| Rosaceae      | Malus        | <i>leiocalyca</i>    | 1   |
| Rosaceae      | Photinia     | <i>beauverdiana</i>  | 1   |
| Rosaceae      | Prunus       | <i>schneideriana</i> | 2   |
| Rosaceae      | Sorbus       | <i>dunnii</i>        | 1   |
| Sabiaceae     | Meliosma     | <i>flexuosa</i>      | 3   |
| Sabiaceae     | Meliosma     | <i>oldhamii</i>      | 7   |
| Schoepfiaceae | Schoepfia    | <i>jasminodora</i>   | 1   |
| Styracaceae   | Alniphyllum  | <i>fortunei</i>      | 40  |
| Styracaceae   | Styrax       | <i>dasyanthus</i>    | 1   |
| Styracaceae   | Styrax       | <i>odoratissimus</i> | 1   |
| Styracaceae   | Styrax       | <i>suberrifolia</i>  | 1   |
| Symplocaceae  | Symplocos    | <i>stellaris</i>     | 1   |
| Taxodiaceae   | Cunninghamia | <i>lanceolata</i>    | 11  |
| Theaceae      | Adinandra    | <i>millettii</i>     | 8   |
| Theaceae      | Schima       | <i>superba</i>       | 284 |
| Theaceae      | Ternstroemia | <i>gymnanthera</i>   | 5   |
| Tiliaceae     | Tilia        | <i>endochrysea</i>   | 2   |
| Ulmaceae      | Celtis       | <i>biondii</i>       | 1   |

---

Table S2: Family, genus, and species names of individuals in the understory tree (3 cm<d<10 cm) cohort. The number of individuals listed refers to the central 10 × 10 cm quadrat of all 25 study plots, i.e. to a total ground area of 2500 m<sup>2</sup>.

| Family           | Genus           | Species              | Individuals |
|------------------|-----------------|----------------------|-------------|
| Anacardiaceae    | Rhus            | <i>hypoleuca</i>     | 4           |
| Anacardiaceae    | Toxicodendron   | <i>succedaneum</i>   | 8           |
| Aquifoliaceae    | Ilex            | <i>buergeri</i>      | 4           |
| Aquifoliaceae    | Ilex            | <i>chinensis</i>     | 5           |
| Aquifoliaceae    | Ilex            | <i>litseifolia</i>   | 10          |
| Aquifoliaceae    | Ilex            | <i>pubescens</i>     | 1           |
| Aquifoliaceae    | Ilex            | <i>suaveolens</i>    | 1           |
| Aquifoliaceae    | Ilex            | <i>wilsonii</i>      | 1           |
| Daphniphyllaceae | Daphniphyllum   | <i>oldhamii</i>      | 9           |
| Ericaceae        | Lyonia          | <i>ovalifolia</i>    | 2           |
| Ericaceae        | Rhododendron    | <i>latouchea</i>     | 27          |
| Ericaceae        | Rhododendron    | <i>mariesii</i>      | 2           |
| Ericaceae        | Rhododendron    | <i>ovatum</i>        | 26          |
| Ericaceae        | Vaccinium       | <i>bracteatum</i>    | 6           |
| Ericaceae        | Vaccinium       | <i>carlesii</i>      | 7           |
| Ericaceae        | Vaccinium       | <i>mandarinorum</i>  | 3           |
| Fabaceae         | Albizia         | <i>kalkora</i>       | 5           |
| Fagaceae         | Castanopsis     | <i>carlesii</i>      | 4           |
| Fagaceae         | Castanopsis     | <i>eyrei</i>         | 44          |
| Fagaceae         | Castanopsis     | <i>fargesii</i>      | 6           |
| Fagaceae         | Castanopsis     | <i>sclerophylla</i>  | 12          |
| Fagaceae         | Castanopsis     | <i>tibetana</i>      | 2           |
| Fagaceae         | Cyclobalanopsis | <i>glauca</i>        | 31          |
| Fagaceae         | Cyclobalanopsis | <i>myrsinaefolia</i> | 6           |
| Fagaceae         | Cyclobalanopsis | <i>stewardiana</i>   | 34          |
| Fagaceae         | Lithocarpus     | <i>glaber</i>        | 91          |
| Fagaceae         | Quercus         | <i>serrata</i>       | 29          |
| Hamamelidaceae   | Corylopsis      | <i>glandulifera</i>  | 15          |
| Hamamelidaceae   | Liquidambar     | <i>formosana</i>     | 2           |
| Hamamelidaceae   | Loropetalum     | <i>chinense</i>      | 13          |
| Lauraceae        | Cinnamomum      | <i>subavenum</i>     | 4           |
| Lauraceae        | Litsea          | <i>coreana</i>       | 1           |
| Lauraceae        | Litsea          | <i>elongata</i>      | 1           |
| Lauraceae        | Machilus        | <i>thunbergii</i>    | 11          |
| Myricaceae       | Myrica          | <i>rubra</i>         | 8           |
| Myrtaceae        | Syzygium        | <i>buxifolium</i>    | 13          |
| Pinaceae         | Pinus           | <i>massoniana</i>    | 16          |
| Pinaceae         | Pinus           | <i>taiwanensis</i>   | 1           |

(continued next page)

(Table S2, continued)

|               |              |                        |    |
|---------------|--------------|------------------------|----|
| Rosaceae      | Photinia     | <i>glabra</i>          | 1  |
| Rosaceae      | Photinia     | <i>parvifolia</i>      | 2  |
| Rosaceae      | Sorbus       | <i>folgneri</i>        | 4  |
| Rubiaceae     | Randia       | <i>cochinchinensis</i> | 2  |
| Sabiaceae     | Meliosma     | <i>flexuosa</i>        | 1  |
| Sabiaceae     | Meliosma     | <i>oldhamii</i>        | 1  |
| Saxifragaceae | Itea         | <i>chinensis</i>       | 6  |
| Styracaceae   | Styrax       | <i>odoratissimus</i>   | 5  |
| Symplocaceae  | Symplocos    | <i>anomala</i>         | 5  |
| Symplocaceae  | Symplocos    | <i>setchuensis</i>     | 1  |
| Symplocaceae  | Symplocos    | <i>stellaris</i>       | 4  |
| Symplocaceae  | Symplocos    | <i>sumuntia</i>        | 8  |
| Theaceae      | Adinandra    | <i>millettii</i>       | 18 |
| Theaceae      | Camellia     | <i>chekiang-oleosa</i> | 12 |
| Theaceae      | Camellia     | <i>fraterna</i>        | 8  |
| Theaceae      | Cleyera      | <i>japonica</i>        | 3  |
| Theaceae      | Eurya        | <i>muricata</i>        | 75 |
| Theaceae      | Eurya        | <i>rubiginosa</i>      | 2  |
| Theaceae      | Schima       | <i>superba</i>         | 46 |
| Theaceae      | Ternstroemia | <i>gymnanthera</i>     | 3  |

---

Fig. S1. Functional trait dendrogram of the species found in the experimental plots. Branch lengths reflect Euclidean distances in a normalized trait space ( $\sigma=1$  along each axis). Functional diversity (FD) was calculated for each plot as total branch length of the subtree containing the species present.

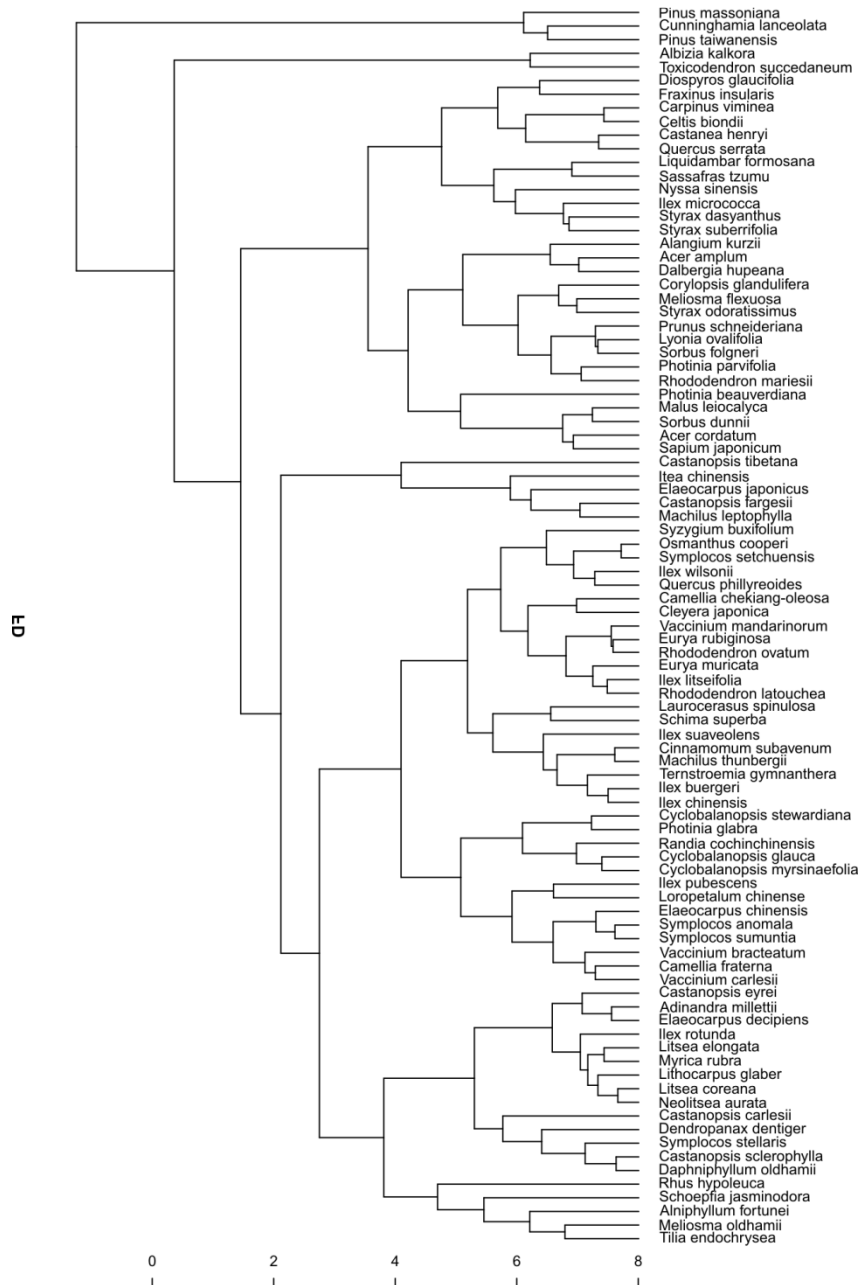

Fig. S2: Phylogeny of species found in the study plots. Phylogenetic diversity (PD) was calculated for each plot as total branch length of the subtree containing the species present.

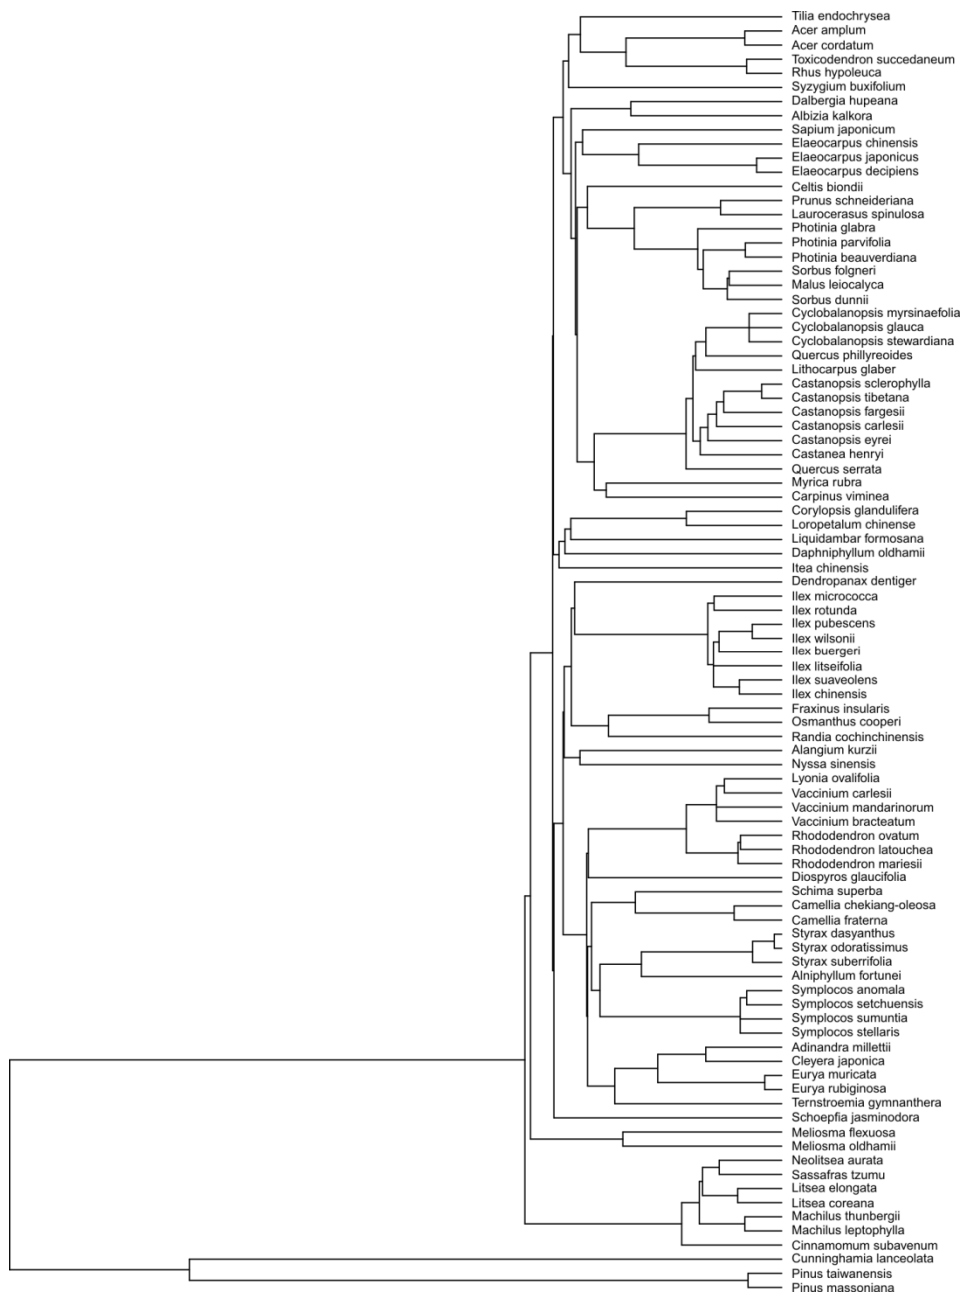

## Method S1. Generation of phylogenetic tree

We gathered sequence information, i.e. *matK*, *rbcL* and the ITS region including the 5.8s gene for all woody species from Gutianshan National Nature Reserve [1] or closely related species available in GenBank (<http://www.ncbi.nlm.nih.gov/genbank/>, accessed between May and June 2012). For some species found in the study plots, *matK* and *rbcL* were sequenced using standard barcoding protocols [2] (Table S3, accessions KF569888-KF569890). All sequences were aligned separately for the different markers using MAFFT v6 [3]. Sequences for *matK* and *rbcL* were aligned with the ‘Auto’ option in the online version of the program (<http://mafft.cbrc.jp/alignment/server/>). The ITS region was aligned with the ‘Q-INS-I’ option considering secondary structure of RNA using the MAFFT application at Bioportal [<https://www.bioportal.uio.no/>, 4]. Aligned sequences were concatenated for each species resulting in a total alignment of 3521 nucleotide positions. A phylogenetic tree was inferred using a Maximum Likelihood (ML) method implemented in PhyML [5]. For ML inference, the best fitting model (GTR+I+G) selected by Modeltest [6] was applied with the following options: tree topology search operation: best of NNI and SPR search, number of substitution rate categories =6, all other parameters were estimated (Gamma Distribution Parameter Alpha, Proportion of Invariable Sites, Transition/Transversion Ratio).

Four species occurring in the CSPs but without sequence information available (Table 1) were added manually to the obtained ML tree by the following procedure. *Acer cordatum* was added within *Acer* as a polytomy to the most recent common ancestor (MRCA) of a monophyletic clade formed by other members of *Acer* sect. *Palmata* (i.e. *A. elegantulum*, *A. wilsonii*, *A. olivaceum*). Its branch length was defined as the average distance from the MRCA of that clade to the tips. *Styrax wuyuanensis*, *Symplocos oblongifolia* and *Vaccinium mandarinorum* were added similarly as polytomy emerging from the MRCA for all other members of the respective genus included, with branch lengths equalling the average branch length from that MRCA to the tips of congeners.

Using the ML topology and branch lengths an ultrametric tree was created by non-parametric rate smoothing (nprs) as implemented in r8s [7]. Absolute node ages were obtained using 27 published fossils or dates as age constrains. A fixed age of 125 million years was applied to the crown node of the Eudicots (Table S4).

Table S3. List of woody species in the Gutianshan National Reserve included in the phylogenetic analysis.

| Species                         | Species substitute or synonym | GeneBank accession number |             |          |
|---------------------------------|-------------------------------|---------------------------|-------------|----------|
|                                 |                               | <i>matK</i>               | <i>rbcl</i> | 5.8s+ITS |
| <i>Abelia_chinensis</i>         |                               | AY310461                  | HQ680737    | FJ745388 |
| <i>Abutilon_theophrasti</i>     |                               | HM850990                  | HM849734    | DQ006017 |
| <i>Acanthopanax_trifoliatum</i> |                               | U58603                    | U50239      |          |
| <i>Acer_amplum</i>              | <i>Acer_campestre</i>         | JN894032                  | DQ978399    | DQ238431 |
| <i>Acer_buergerianum</i>        |                               |                           | DQ978396    | U89908   |
| <i>Acer_cordatum</i>            | added manually to ML tree     |                           |             |          |
| <i>Acer_davidii</i>             |                               | JF952989                  | DQ978406    | JF975773 |
| <i>Acer_elegantulum</i>         |                               | HQ427339                  | HQ427191    |          |
| <i>Acer_mono</i>                |                               |                           | DQ978416    | AY605447 |
| <i>Acer_olivaceum</i>           |                               | HQ427338                  |             |          |
| <i>Acer_tataricum</i>           |                               |                           | DQ978436    | AY605363 |
| <i>Acer_wilsonii</i>            |                               | HQ427337                  | HQ427189    | HM352665 |
| <i>Actinidia_callosa</i>        |                               | AF322620                  | AJ549061    | AF323829 |
| <i>Actinidia_chinensis</i>      |                               | U61324                    | L01882      |          |
| <i>Actinidia_hemsleyana</i>     |                               | AF322608                  | AJ549036    | AF323802 |
| <i>Actinidia_lanceolata</i>     |                               |                           | AJ549072    |          |
| <i>Actinidia_melanandra</i>     |                               | AF322600                  |             | AF443211 |
| <i>Adina_rubella</i>            |                               |                           | AJ346965    | AJ346856 |
| <i>Adinandra_millettii</i>      |                               | AF380069                  | HQ427223    | AY626848 |
| <i>Aesculus_chinensis</i>       |                               | EU687709                  |             | JF421459 |
| <i>Ailanthus_altissima</i>      |                               | EF489111                  | HM849750    | JF755934 |
| <i>Akebia_quinata</i>           |                               | AF542587                  | L12627      | GQ339575 |
| <i>Akebia_trifoliata</i>        |                               | GQ434168                  | AF335305    | AY029788 |
| <i>Alangium_kurzii</i>          |                               | FJ644650                  | DQ340449    | FJ610018 |
| <i>Alangium_platanifolium</i>   |                               | FJ644640                  | JF308649    | FJ610006 |
| <i>Albizia_julibrissin</i>      |                               | AY386855                  | GU135262    | FJ572041 |
| <i>Albizia_kalkora</i>          |                               | HQ427295                  | HQ427141    | JF708202 |
| <i>Alniphyllum_fortunei</i>     |                               | HQ427279                  | AF396149    | AF396437 |
| <i>Amelanchier_asiatica</i>     |                               |                           |             | JQ392362 |
| <i>Antidesma_japonicum</i>      | <i>Antidesma_venosum</i>      | HQ415372                  | JF265291    |          |
| <i>Aphananthe_aspera</i>        |                               | AF345320                  | AF500339    |          |



|                                 |                           |          |          |          |
|---------------------------------|---------------------------|----------|----------|----------|
| <i>Aralia chinensis</i>         |                           | HQ427393 | HQ427250 | U63181   |
| <i>Aralia dasyphylla</i>        |                           |          |          | DQ007355 |
| <i>Aralia echinocaulis</i>      |                           |          |          | AF273525 |
| <i>Ardisia brevicaulis</i>      |                           |          |          | FJ482141 |
| <i>Ardisia crenata</i>          |                           | HQ427412 | L12599   | JN645186 |
| <i>Ardisia crispa</i>           |                           |          |          | FJ482139 |
| <i>Ardisia hanceana</i>         |                           |          |          | JN645190 |
| <i>Ardisia japonica</i>         |                           | JF416274 | GQ436756 | JN645201 |
| <i>Berberis soulieana</i>       | <i>Berberis fortunei</i>  |          | FJ449857 | FJ980428 |
| <i>Berchemia huana</i>          | <i>Berchemia zeyheri</i>  | JF270656 | JF265303 |          |
| <i>Betula luminifera</i>        |                           | FJ011821 |          | AY761116 |
| <i>Bischofia polycarpa</i>      | <i>Bischofia javanica</i> | GU135116 | AY663571 |          |
| <i>Broussonetia papyrifera</i>  |                           | AF345326 | JF317478 | HM623778 |
| <i>Buddleja lindeyana</i>       | <i>Buddleja davidii</i>   | HQ384530 | AJ001757 |          |
| <i>Buxus sinica</i>             | <i>Buxus sempervirens</i> | AF543728 | HM849831 | EF123195 |
| <i>Caesalpinia decapetala</i>   |                           | HM049555 |          | JF708207 |
| <i>Callicarpa bodinieri</i>     |                           | HQ427330 | HQ427182 |          |
| <i>Callicarpa giraldii</i>      |                           | HQ427332 | HQ427184 | FJ593347 |
| <i>Callicarpa japonica</i>      |                           | FM163257 |          | FM163230 |
| <i>Callicarpa rubella</i>       |                           | HQ427329 | HQ427181 | FM163232 |
| <i>Camellia brevistyla</i>      |                           |          |          | HM061465 |
| <i>Camellia chekiangoleosa</i>  |                           | HQ427374 | HQ427229 | EU579685 |
| <i>Camellia cuspidata</i>       |                           | HQ427370 | HQ427225 | EU579693 |
| <i>Camellia fraterna</i>        |                           |          | HQ427224 | EU579705 |
| <i>Camellia oleifera</i>        |                           |          | GQ436647 | HM061454 |
| <i>Camellia sinensis</i>        |                           | AJ429305 | AF380037 | HM061514 |
| <i>Camptotheca acuminata</i>    |                           | JF953409 | L11211   | JF976064 |
| <i>Campylotropis macrocarpa</i> |                           | AY386870 | EU717277 | GU572164 |
| <i>Caragana sinica</i>          |                           | HM049541 | FJ537233 | FJ537284 |
| <i>Carpinus londoniana</i>      |                           | AY211990 |          | AF432040 |
| <i>Carpinus viminea</i>         |                           | AY212000 | HQ427161 | AF432058 |
| <i>Castanea henryi</i>          |                           | EF057123 |          |          |
| <i>Castanea mollissima</i>      |                           | EF057124 |          |          |
| <i>Castanea seguinii</i>        |                           | AY263920 | AY263937 |          |
| <i>Castanopsis carlesii</i>     |                           | AY040496 | HQ427175 | AY040372 |

|                                  |                                   |          |          |          |
|----------------------------------|-----------------------------------|----------|----------|----------|
| <i>Castanopsis_eyrei</i>         |                                   | EF057125 | HQ427167 | EF057109 |
| <i>Castanopsis_fargesii</i>      |                                   | EF057133 | HQ427173 | AY040383 |
| <i>Castanopsis_sclerophylla</i>  |                                   | EF057137 |          | EF057106 |
| <i>Castanopsis_tibetana</i>      |                                   | AY263921 | AY147096 |          |
| <i>Celastrus_aculeatus</i>       |                                   |          |          | JQ424095 |
| <i>Celastrus_angulatus</i>       |                                   | EU328938 |          | JQ424098 |
| <i>Celastrus_gemmatus</i>        |                                   |          |          | JQ424102 |
| <i>Celastrus_oblanceifolius</i>  |                                   |          |          | JQ424119 |
| <i>Celastrus_rosthornianus</i>   |                                   | EU328940 |          | JQ424130 |
| <i>Celastrus_stylosus</i>        |                                   |          |          | JQ424136 |
| <i>Celtis_biondii</i>            |                                   | KF569895 | KF569888 |          |
| <i>Celtis_tetrandra</i>          |                                   |          | JF317479 |          |
| <i>Cephalotaxus_fortunei</i>     |                                   | AF228109 | AY450863 |          |
| <i>Cephalotaxus_sinensis</i>     |                                   | AF228110 | EF660728 |          |
| <i>Cerasus_campanulata</i>       | syn. <i>Prunus campanulata</i>    |          | AF411501 | AF318658 |
| <i>Chimonanthus_salicifolius</i> |                                   | HQ427325 | HQ427177 | AY786102 |
| <i>Choerospondias_axillaris</i>  |                                   | HQ427341 | HQ427193 | GQ434625 |
| <i>Cinnamomum_camphora</i>       |                                   | AJ247154 | L12641   | AY878325 |
| <i>Cinnamomum_chekiangense</i>   |                                   | HQ427409 | HQ427267 |          |
| <i>Cinnamomum_subavenium</i>     |                                   | HQ427408 | HQ427266 | GU598529 |
| <i>Cladrastis_wilsonii</i>       | <i>Cladrastis sikokiana</i>       |          | U74232   | JQ676968 |
| <i>Clerodendrum_bungei</i>       |                                   |          |          | U77744   |
| <i>Clerodendrum_cyrtophyllum</i> |                                   | HQ427333 | HQ427185 | JF755940 |
| <i>Clerodendrum_trichotomum</i>  |                                   | AF477760 | HQ427186 | U77771   |
| <i>Clethra_barbinervis</i>       |                                   | AB697681 | AF421089 | AY190573 |
| <i>Cleyera_japonica</i>          |                                   | HQ427371 | EU980811 | AF456257 |
| <i>Coptosapelta_diffusa</i>      |                                   |          | EU145453 | DQ358882 |
| <i>Corchoropsis_crenata</i>      |                                   |          | FJ848895 |          |
| <i>Corchorus_aestuans</i>        |                                   |          |          | DQ311675 |
| <i>Cornus_controversa</i>        |                                   | U96893   | AF190433 | AY530918 |
| <i>Cornus_kousa</i>              |                                   | DQ341345 | L14395   | DQ340555 |
| <i>Corylopsis_glandulifera</i>   | syn. <i>Corylopsis hypoglauca</i> | HQ427314 | HQ427165 | EF456719 |
| <i>Corylopsis_sinensis</i>       |                                   | AF013038 | AB237032 | EF456711 |
| <i>Crataegus_cuneata</i>         | <i>Crataegus monogyna</i>         | JN893932 | JN890652 |          |
| <i>Cryptomeria_fortunei</i>      |                                   | AB030117 |          |          |

|                                      |                                  |          |          |          |
|--------------------------------------|----------------------------------|----------|----------|----------|
| <i>Cunninghamia lanceolata</i>       |                                  | AB030125 | AY140260 |          |
| <i>Cyclobalanopsis glauca</i>        | syn. <i>Quercus glauca</i>       | AB060062 | AB060571 | AY040458 |
| <i>Cyclobalanopsis gracilis</i>      | syn. <i>Quercus ciliaris</i>     | HQ427318 | HQ427169 |          |
| <i>Cyclobalanopsis nubium</i>        | syn. <i>Quercus sessilifolia</i> | AB060068 | AB060577 |          |
| <i>Cyclobalanopsis stewardiana</i>   |                                  | KF569896 | KF569889 |          |
| <i>Cyclocarya paliurus</i>           |                                  | AY147098 | AY147094 | AF303817 |
| <i>Dalbergia hupeana</i>             |                                  | HQ427296 | U74236   | GU217673 |
| <i>Daphne genkwa</i>                 | <i>Daphne laureola</i>           | JN894952 | HM849946 | GQ167533 |
| <i>Daphniphyllum macropodum</i>      |                                  |          | AM183400 |          |
| <i>Daphniphyllum oldhamii</i>        |                                  | HQ427311 | HQ427162 | JN040993 |
| <i>Dendropanax dentiger</i>          |                                  | HQ427394 | HQ427251 | GU054694 |
| <i>Deutzia glauca</i>                | <i>Deutzia setchuenensis</i>     | JF308687 | JF308658 |          |
| <i>Diospyros glaucifolia</i>         |                                  | HQ427382 | EU980694 | FJ624405 |
| <i>Diospyros morrisiana</i>          |                                  | HQ427383 | HQ427240 |          |
| <i>Diospyros oleifera</i>            |                                  | AB174997 |          | AB175016 |
| <i>Diospyros rhombifolia</i>         |                                  | AB174999 | EU980741 | AB175018 |
| <i>Distylium myricoides</i>          |                                  | GU576683 | AM183408 | GU576648 |
| <i>Edgeworthia chrysantha</i>        |                                  |          | AJ297920 | AJ744932 |
| <i>Ehretia thyrsoiflora</i>          |                                  |          | EU599831 |          |
| <i>Elaeagnus glabra</i>              |                                  |          |          | JQ062502 |
| <i>Elaeagnus multiflora</i>          |                                  |          |          | JQ062478 |
| <i>Elaeagnus pungens</i>             |                                  | GU135102 | GU135269 | JQ062488 |
| <i>Elaeagnus umbellata</i>           |                                  | AY257529 | HM849968 | JQ062486 |
| <i>Elaeocarpus chinensis</i>         |                                  |          | HQ427153 |          |
| <i>Elaeocarpus decipiens</i>         |                                  | HQ415261 | HQ415077 |          |
| <i>Elaeocarpus japonicus</i>         |                                  | HQ415264 | HQ415080 |          |
| <i>Eleutherococcus gracilistylus</i> |                                  |          | GQ436710 | FJ980422 |
| <i>Emmenopterys henryi</i>           |                                  | FJ905360 | Y18715   | FJ984985 |
| <i>Euchresta japonica</i>            |                                  |          | AB127040 |          |
| <i>Euodia faugeaii</i>               | <i>Euodia hupehensis</i>         | EF489105 | FN552679 |          |
| <i>Euonymus alatus</i>               |                                  | EU328950 |          | EU328755 |
| <i>Euonymus carnosus</i>             |                                  | HQ427389 | HQ427246 |          |
| <i>Euonymus centidens</i>            |                                  | HQ427390 | HQ427247 |          |
| <i>Euonymus fortunei</i>             |                                  | HQ393828 | HM755927 | HQ393699 |
| <i>Euonymus myrianthus</i>           |                                  | HQ427388 | HQ427245 | HQ393721 |

|                                |                                      |          |          |          |
|--------------------------------|--------------------------------------|----------|----------|----------|
| <i>Euonymus oblongifolius</i>  | syn. <i>Euonymus nitidus</i>         | HQ393835 | HQ427248 | JQ424144 |
| <i>Euonymus oxyphyllus</i>     |                                      | HQ393836 |          | HQ393704 |
| <i>Eurya alata</i>             |                                      |          |          | AF456259 |
| <i>Eurya hebeclados</i>        |                                      |          |          | AY626865 |
| <i>Eurya loquaiana</i>         |                                      | HQ427372 | HQ427227 | AY626870 |
| <i>Eurya muricata</i>          |                                      | HQ427373 | HQ427228 | AY626872 |
| <i>Eurya nitida</i>            |                                      |          |          | AY096026 |
| <i>Eurya rubiginosa</i>        |                                      | HQ427368 | HQ427222 | AY626877 |
| <i>Euscaphis japonica</i>      |                                      | DQ663628 | DQ307099 |          |
| <i>Fagus engleriana</i>        |                                      | AY042391 | JF941501 | AY232907 |
| <i>Fagus longipetiolata</i>    |                                      | AY042402 | JF941508 | AY232955 |
| <i>Fagus lucida</i>            |                                      | EF057139 | JF941510 | AY232963 |
| <i>Ficus erecta</i>            |                                      | HQ427366 | HQ427220 | HQ890729 |
| <i>Ficus heteromorpha</i>      |                                      |          | JF941536 |          |
| <i>Ficus pandurata</i>         |                                      | HQ415327 | HQ415153 |          |
| <i>Ficus pumila</i>            |                                      | HM851109 | AF500352 | AY063580 |
| <i>Ficus sarmentosa</i>        |                                      |          |          | AB485901 |
| <i>Firmiana platanifolia</i>   |                                      |          | AY328192 | AF460185 |
| <i>Fontanesia fortunei</i>     | syn. <i>Fontanesia phillyreoides</i> |          |          | AF534815 |
| <i>Forsythia viridissima</i>   |                                      | FJ263957 |          | AF534810 |
| <i>Fraxinus chinensis</i>      |                                      | HM171509 | DQ673301 | HQ705225 |
| <i>Fraxinus insularis</i>      |                                      | HQ427335 | HQ427187 |          |
| <i>Gardenia jasminoides</i>    |                                      | HQ427344 | GQ436564 | GQ434646 |
| <i>Gardneria multiflora</i>    |                                      |          |          | JF937929 |
| <i>Gleditsia sinensis</i>      |                                      | AM086835 |          | AF510019 |
| <i>Glochidion puberum</i>      |                                      | HQ427285 | AY663586 | AY936659 |
| <i>Gymnocladus chinensis</i>   |                                      |          |          | AF510033 |
| <i>Hamamelis mollis</i>        |                                      | AF128827 | L01922   | GU576659 |
| <i>Helwingia japonica</i>      |                                      | AJ430195 | L11226   | AF200593 |
| <i>Hibiscus syriacus</i>       |                                      | AF345329 | AY328174 | AF460188 |
| <i>Holboellia coriacea</i>     | <i>Holboellia grandiflora</i>        | FJ626513 | AF398181 | AY029779 |
| <i>Hovenia dulcis</i>          |                                      |          |          | DQ146607 |
| <i>Hovenia trichocarpa</i>     |                                      | JF317429 | JF317489 | DQ146608 |
| <i>Hydrangea angustipetala</i> |                                      | GU217336 |          |          |
| <i>Hydrangea anomala</i>       |                                      | GU369710 | AF323202 | JF976651 |

|                               |                                  |          |           |          |
|-------------------------------|----------------------------------|----------|-----------|----------|
| <i>Hydrangea chinensis</i>    |                                  | KF569897 | KF569890  | AB377211 |
| <i>Hydrangea paniculata</i>   |                                  | HQ427310 | AB236036  |          |
| <i>Hydrangea strigosa</i>     | syn. <i>Hydrangea aspera</i>     | AJ429277 | JF941958  | JF976653 |
| <i>Idesia polycarpa</i>       |                                  | FJ670040 | AF206781  | AJ006441 |
| <i>Ilex buergeri</i>          |                                  |          | FJ394593  | FJ394663 |
| <i>Ilex cornuta</i>           |                                  | GQ997309 | FJ394601  | EU647650 |
| <i>Ilex elmerrilliana</i>     |                                  |          | HQ427132  |          |
| <i>Ilex ficoidea</i>          |                                  | HQ427288 | HQ427133  | FJ394682 |
| <i>Ilex latifolia</i>         |                                  | HQ427289 | X98731    | DQ200798 |
| <i>Ilex litseaefolia</i>      |                                  | KF569898 |           |          |
| <i>Ilex macrocarpa</i>        |                                  |          | AJ4927271 | AJ492689 |
| <i>Ilex micrococca</i>        |                                  | HQ427290 | X98721    | JF976691 |
| <i>Ilex pubescens</i>         |                                  | HQ427291 | AJ492722  | AJ492686 |
| <i>Ilex purpurea</i>          |                                  | HQ427292 | AJ492710  | FJ394708 |
| <i>Ilex rotunda</i>           |                                  | HQ415255 | X98720    | FJ394710 |
| <i>Ilex suaveolens</i>        |                                  | HQ427293 | HQ427139  |          |
| <i>Ilex triflora</i>          |                                  |          | AJ4927131 | AJ492675 |
| <i>Ilex tsoii</i>             |                                  |          | FJ394645  | FJ394718 |
| <i>Ilex wilsonii</i>          |                                  | HQ427294 | FJ394649  | FJ394722 |
| <i>Illicium lanceolatum</i>   |                                  | HQ427283 | HQ427126  | JQ180205 |
| <i>Indigofera decora</i>      |                                  |          |           | AF534797 |
| <i>Itea chinensis</i>         |                                  | HQ415356 | HQ415186  |          |
| <i>Jasminum sinsense</i>      | syn. <i>Jasminum nudiflorum</i>  | AF531779 |           | AF361301 |
| <i>Juglans cathayensis</i>    |                                  | AF118028 |           |          |
| <i>Juniperus chinensis</i>    |                                  | HM024014 | HM024292  |          |
| <i>Juniperus formosana</i>    |                                  | HM024028 | HM024306  |          |
| <i>Kerria japonica</i>        |                                  | AB073686 | AF132893  |          |
| <i>Koelreuteria bipinnata</i> |                                  |          | DQ978447  |          |
| <i>Lasianthus japonicus</i>   |                                  | HQ427345 | HQ427196  |          |
| <i>Lespedeza buergeri</i>     |                                  |          |           | JN402408 |
| <i>Lespedeza cyrtobotrya</i>  |                                  |          |           | JN402422 |
| <i>Lespedeza dunnii</i>       |                                  |          |           | JN402431 |
| <i>Lespedeza floribunda</i>   |                                  | HM049538 | GQ436353  | JN402438 |
| <i>Lespedeza formosa</i>      | syn. <i>Lespedeza thunbergii</i> |          | HQ427143  | JN402486 |
| <i>Ligustrum lucidum</i>      |                                  | EU669873 | GQ436542  | JF976848 |

|                                  |          |          |          |
|----------------------------------|----------|----------|----------|
| <i>Ligustrum_sinense</i>         | JF830514 | JF830433 | JF830366 |
| <i>Lindera_aggregata</i>         | AB442057 | HM019473 | AB470487 |
| <i>Lindera_erythrocarpa</i>      | AB259065 |          | HQ697215 |
| <i>Lindera_glauca</i>            | AB442056 | HM019478 | AB500615 |
| <i>Lindera_megaphylla</i>        | AF244404 |          | AY265406 |
| <i>Lindera_reflexa</i>           | AF244401 | HQ427264 | AY265407 |
| <i>Liquidambar_acalycina</i>     | AF015649 | DQ352380 | GU576668 |
| <i>Liquidambar_formosana</i>     | AF133221 | AJ131772 | AF015436 |
| <i>Liriodendron_chinense</i>     | AF123481 | AY841593 |          |
| <i>Lithocarpus_cleistocarpus</i> | EF057117 |          | EF057114 |
| <i>Lithocarpus_glaber</i>        | HQ427322 | AB060568 | AY040435 |
| <i>Lithocarpus_hancei</i>        |          |          | AY040451 |
| <i>Litsea_coreana</i>            | HQ427405 | HQ427263 | AF272286 |
| <i>Litsea_cubeba</i>             | AF244398 | AY337734 | AB260863 |
| <i>Litsea_elongata</i>           | HQ427403 | HQ427261 | DQ120606 |
| <i>Lonicera_hypoglauca</i>       | HM228434 | HM228478 | FJ372916 |
| <i>Lonicera_japonica</i>         | GQ997392 | HM850134 | JQ780992 |
| <i>Lonicera_macranthoides</i>    | HM228448 | HM228492 | FJ372918 |
| <i>Lonicera_modesta</i>          |          |          | EU240716 |
| <i>Loropetalum_chinense</i>      | HQ427312 | AF061999 | GU576672 |
| <i>Lyonia_ovalifolia</i>         | U61305   | AF124580 |          |
| <i>Maackia_chinensis</i>         |          |          | EF457721 |
| <i>Machilus_grijsii</i>          | KF569899 | KF569893 | JF976985 |
| <i>Machilus_leptophylla</i>      | HM019350 | HM019490 | EF538697 |
| <i>Machilus_pauhoi</i>           | HQ427418 | HM019496 | EF538695 |
| <i>Machilus_thunbergii</i>       | KF569890 | KF569894 | FJ755429 |
| <i>Maesa_japonica</i>            |          |          | JF708192 |
| <i>Magnolia_cylindrica</i>       | HQ427420 | AY008914 |          |
| <i>Magnolia_denudata</i>         | AF123465 | AY008913 | EU593545 |
| <i>Magnolia_officinalis</i>      | AF548641 | AY008933 | EU593549 |
| <i>Mahonia_bealei</i>            | DQ478617 | L12657   | FJ424229 |
| <i>Mallotus_japonicus</i>        | AB268027 | AY794934 |          |
| <i>Mallotus_repandus</i>         | EF582678 | GU441787 | DQ866617 |
| <i>Malus_hupehensis</i>          | AF309179 | JQ391346 | JQ392455 |
| <i>Malus_leiocalyca</i>          | HQ427351 | HQ427202 |          |

|                                  |                                   |          |          |          |
|----------------------------------|-----------------------------------|----------|----------|----------|
| <i>Manglietia_fordiana</i>       |                                   | AY952412 | L12658   |          |
| <i>Melastoma_dodecandrum</i>     |                                   |          | GQ436727 | GQ265883 |
| <i>Melia_azedarach</i>           |                                   | EF489117 | AY128234 | AY695595 |
| <i>Meliosma_flexuosa</i>         |                                   | HQ427361 | HQ427214 |          |
| <i>Meliosma_oldhamii</i>         |                                   | HQ427360 | HQ427213 |          |
| <i>Meliosma_rigida</i>           |                                   | HQ415309 | HQ415132 |          |
| <i>Michelia_maudiae</i>          |                                   | HQ415276 | HQ415093 | EU593553 |
| <i>Michelia_skinneriana</i>      |                                   | HQ427417 | HQ427275 |          |
| <i>Microtropis_fokienensis</i>   |                                   | HQ393848 |          | HQ393683 |
| <i>Millettia_dielsiana</i>       | syn. <i>Callerya_cinerea</i>      |          | GQ436360 | FJ980295 |
| <i>Millettia_reticulata</i>      | syn. <i>Callerya_reticulata</i>   | AF142733 |          | AF467031 |
| <i>Morus_alba</i>                |                                   | AB038183 | L01933   | JN407493 |
| <i>Morus_australis</i>           |                                   | GU145559 | GU145573 | AY345152 |
| <i>Morus_cathayana</i>           |                                   | GU145565 | GU145579 | AM042001 |
| <i>Mussaenda_shikokiana</i>      |                                   |          |          | AJ846854 |
| <i>Myrica_rubra</i>              | syn. <i>Morella_rubra</i>         | HQ427396 | HQ427253 | AJ626784 |
| <i>Myrsine_retusa</i>            |                                   | HM850887 | HM850193 |          |
| <i>Neolitsea_aurata</i>          |                                   | HM019358 | HM019498 | JF977135 |
| <i>Nyssa_sinensis</i>            |                                   | JF308675 | JF308651 | EU734444 |
| <i>Orixa_japonica</i>            |                                   | EF489106 |          | HM851496 |
| <i>Ormosia_henryi</i>            |                                   | HM049514 |          |          |
| <i>Osbeckia_chinensis</i>        |                                   |          | AF215525 |          |
| <i>Osmanthus_cooperi</i>         |                                   | EU669875 | HQ427188 | EF362772 |
| <i>Osmanthus_fragrans</i>        |                                   | FM208253 |          | EU314904 |
| <i>Osmanthus_matsumuranus</i>    |                                   | EU409435 |          | EF362770 |
| <i>Persea_grijsii</i>            |                                   | AJ247180 |          |          |
| <i>Pertusadina_hainanensis</i>   |                                   | HQ427346 | AJ347002 | AJ346892 |
| <i>Philadelphus_brachybotrys</i> | <i>Philadelphus_pekinensis</i>    | GU217268 |          |          |
| <i>Phoebe_bournei</i>            |                                   | HM019369 | HM019509 | EF538706 |
| <i>Phoebe_sheareri</i>           |                                   | HQ427400 | HM019513 | FM957848 |
| <i>Photinia_beauverdiana</i>     |                                   | HQ427353 | HQ427204 | JQ392492 |
| <i>Photinia_glabra</i>           |                                   | HQ427354 | HQ427205 | FJ796905 |
| <i>Photinia_parvifolia</i>       |                                   | HQ427355 | HQ427206 | GQ368497 |
| <i>Photinia_serrulata</i>        | syn. <i>Photinia_serratifolia</i> | AF288111 | GQ436594 | GQ368486 |
| <i>Photinia_villosa</i>          |                                   |          |          | FJ810016 |

|                                |                                   |          |          |          |
|--------------------------------|-----------------------------------|----------|----------|----------|
| <i>Phyllanthus_glaucus</i>     |                                   |          | AY765271 | HM106990 |
| <i>Phyllanthus_urinaria</i>    |                                   |          | AY765268 | AY936735 |
| <i>Picrasma_quassioides</i>    |                                   | HQ427327 | EU043008 | GQ434548 |
| <i>Pieris_formosa</i>          |                                   | U61303   | AF124581 | EU547690 |
| <i>Pieris_japonica</i>         |                                   | AB206598 | AB206589 | EU547692 |
| <i>Pieris_taiwanensis</i>      |                                   | AB206599 | AB206593 |          |
| <i>Pinus_massoniana</i>        |                                   | DQ353716 | DQ353732 |          |
| <i>Pinus_taiwanensis</i>       |                                   | AB161016 | DQ156493 |          |
| <i>Pistacia_chinensis</i>      |                                   |          | FN599457 | EF193079 |
| <i>Pittosporum_illicioides</i> |                                   | HQ427307 | HQ427157 |          |
| <i>Platycarya_strobilacea</i>  |                                   | HQ427308 | AY263933 | AF303808 |
| <i>Pleioblastus_amarus</i>     | <i>Arundinaria tecta</i>          |          | EF125165 | AJ746179 |
| <i>Podocarpus_macrophyllus</i> |                                   |          | AF228111 | AF249616 |
| <i>Podocarpus_nagi</i>         | syn. <i>Nageia nagi</i>           |          | AB644449 | AB644468 |
| <i>Polygala_arillata</i>       |                                   |          |          | AM234210 |
| <i>Populus_adenopoda</i>       | <i>Populus tremula</i>            |          | AJ506086 | AJ418827 |
| <i>Pourthiaea_hirsuta</i>      |                                   |          |          | GQ368494 |
| <i>Premna_microphylla</i>      |                                   | HQ427331 | U28883   |          |
| <i>Prunus_discoidea</i>        |                                   |          |          | HQ427208 |
| <i>Prunus_mume</i>             |                                   | JF955822 | AF411491 | JF978116 |
| <i>Prunus_persica</i>          |                                   | AF288117 | AF411493 | JF978127 |
| <i>Prunus_phaeosticta</i>      |                                   | HQ415272 | HQ415089 | EU669095 |
| <i>Prunus_salicina</i>         |                                   |          | AF411494 | AF318725 |
| <i>Prunus_schneideriana</i>    |                                   | HQ427356 | HQ427209 | EU370928 |
| <i>Prunus_serrulata</i>        |                                   | GU363780 | AF411487 | AF318721 |
| <i>Prunus_spinulosa</i>        |                                   | HQ427357 | AF411503 | AF411513 |
| <i>Prunus_undulata</i>         |                                   |          |          | EU669108 |
| <i>Pseudolarix_kaempferi</i>   |                                   | AB019866 | X58782   |          |
| <i>Pterocarya_insignis</i>     | syn. <i>Pterocarya macroptera</i> |          |          | AF303814 |
| <i>Pterocarya_stenoptera</i>   |                                   | AF118042 |          | AF179587 |
| <i>Pyrus_calleryana</i>        |                                   |          | JQ391379 | JQ392478 |
| <i>Quercus_acutissima</i>      |                                   | AB060069 | AB060578 | AF098428 |
| <i>Quercus_fabri</i>           |                                   |          |          | HE591366 |
| <i>Quercus_myrsinifolia</i>    |                                   | AB060063 | AB060572 | AF098414 |
| <i>Quercus_phillyraeoides</i>  |                                   | HQ427324 | AB060573 | AY040462 |



|                                |                                   |          |           |          |
|--------------------------------|-----------------------------------|----------|-----------|----------|
| <i>Quercus_serrata</i>         |                                   | AB060067 | AB060576  |          |
| <i>Quercus_variabilis</i>      |                                   | AB060065 | AB060574  | AY040463 |
| <i>Randia_cochinchinensis</i>  | syn. <i>Aidia cochinchinensis</i> | HQ427347 | HQ427198  |          |
| <i>Rhamnella_franguloides</i>  |                                   |          | AJ3900271 | AY626454 |
| <i>Rhamnus_crenata</i>         |                                   | HQ427385 | HQ427242  | AY626443 |
| <i>Rhamnus_utilis</i>          |                                   | JF317432 | JF317492  |          |
| <i>Rhaphiolepis_indica</i>     |                                   | HQ427352 | HQ427203  | JQ392494 |
| <i>Rhododendron_fortunei</i>   |                                   | AF454850 | HQ706905  | AF393407 |
| <i>Rhododendron_latoucheae</i> |                                   | HQ427298 | HQ427145  |          |
| <i>Rhododendron_mariesii</i>   |                                   | AF454860 | HQ427147  | AF297202 |
| <i>Rhododendron_ovatum</i>     |                                   | U61330   | HQ427144  | JF978354 |
| <i>Rhododendron_simiarum</i>   |                                   |          | HQ706935  | HQ707070 |
| <i>Rhododendron_simsii</i>     |                                   | HQ427299 | GQ997829  | JF978401 |
| <i>Rhus_chinensis</i>          |                                   |          | FN599458  | EF682845 |
| <i>Rhus_hypoleuca</i>          |                                   | HQ427342 |           |          |
| <i>Rosa_bracteata</i>          |                                   | HM490026 |           |          |
| <i>Rosa_cymosa</i>             |                                   | AB039317 |           | HM593924 |
| <i>Rosa_henryi</i>             |                                   | AB039310 |           | AB038454 |
| <i>Rosa_laevigata</i>          |                                   | AB011997 | GU363797  | JN407516 |
| <i>Rosa_multiflora</i>         |                                   | AB039304 | GQ436573  | HM593923 |
| <i>Rosa_rubus</i>              |                                   | FJ472525 |           | FJ416660 |
| <i>Rubus_amphidasys</i>        |                                   |          |           | AY083367 |
| <i>Rubus_buengeri</i>          |                                   |          |           | FJ472903 |
| <i>Rubus_chingii</i>           |                                   | HQ427358 | HQ427211  |          |
| <i>Rubus_corchorifolius</i>    |                                   |          |           | JF708203 |
| <i>Rubus_coreanus</i>          |                                   |          |           | FJ472906 |
| <i>Rubus_hirsutus</i>          |                                   | GU363753 | GU363792  | FJ472891 |
| <i>Rubus_hunanensis</i>        |                                   |          |           | FJ472902 |
| <i>Rubus_irenaeus</i>          |                                   |          |           | EF034131 |
| <i>Rubus_lambertianus</i>      |                                   |          |           | FJ472904 |
| <i>Rubus_parvifolius</i>       |                                   | AB073699 | GU363802  | JN407526 |
| <i>Rubus_pungens</i>           |                                   |          |           | FJ472893 |
| <i>Rubus_reflexus</i>          |                                   | JN407197 | JN407362  | JN407520 |
| <i>Rubus_swinhoei</i>          |                                   |          |           | EF034143 |
| <i>Rubus_tephrodes</i>         |                                   |          |           | EF034144 |

|                                |                                      |          |           |          |
|--------------------------------|--------------------------------------|----------|-----------|----------|
| <i>Rubus_trianthus</i>         |                                      |          |           | AY083366 |
| <i>Sabia_campanulata</i>       |                                      |          | AM183414  |          |
| <i>Sabia_japonica</i>          |                                      | AM396512 |           |          |
| <i>Sabia_swinhoei</i>          |                                      | GU266603 | FJ626616  |          |
| <i>Sageretia_thea</i>          |                                      |          | AJ2257851 | AY626453 |
| <i>Salix_babylonica</i>        |                                      | AJ849593 | FJ788588  |          |
| <i>Sambucus_chinensis</i>      |                                      | JF956210 | JF944185  | JF978521 |
| <i>Sambucus_williamsii</i>     |                                      |          |           | JN040994 |
| <i>Sapindus_mukorossi</i>      |                                      |          | FN599461  |          |
| <i>Sapium_discolor</i>         | syn. <i>Triadica cochinchinensis</i> | HQ415366 | HQ415199  | JF733770 |
| <i>Sapium_japonica</i>         | syn. <i>Neoshirakia japonica</i>     |          | AY794856  |          |
| <i>Sapium_sebifera</i>         | syn. <i>Triadica sebifera</i>        | GU135113 | AY794859  | GU441830 |
| <i>Sassafras_tzumu</i>         |                                      | AF244391 | HM019516  | GU082375 |
| <i>Schima_superba</i>          |                                      | AJ429306 | Z80208    | HM100443 |
| <i>Schoepfia_jasminodora</i>   |                                      | HQ415321 | HQ415146  |          |
| <i>Securinega_suffruticosa</i> | <i>Securinega capuronii</i>          |          | AY663621  |          |
| <i>Serissa_foetida</i>         | syn. <i>Serissa serissoides</i>      |          | Z68822    | FJ980385 |
| <i>Skimmia_reevesiana</i>      |                                      | FN668822 | FN599464  |          |
| <i>Sloanea_sinensis</i>        |                                      |          | HQ427152  |          |
| <i>Sorbus_alnifolia</i>        | syn. <i>Aria alnifolia</i>           | DQ860451 |           | FJ810006 |
| <i>Sorbus_dunnii</i>           | syn. <i>Aria dunnii</i>              |          |           | GQ368505 |
| <i>Sorbus_folgeneri</i>        |                                      | HQ427359 | HQ427212  |          |
| <i>Sorbus_hemsleyi</i>         |                                      |          |           | FJ810010 |
| <i>Spiraea_blumei</i>          |                                      | JQ041791 |           | JQ041773 |
| <i>Spiraea_cantonensis</i>     |                                      | AF288127 |           | DQ897609 |
| <i>Spiraea_chinensis</i>       |                                      | JQ041792 |           | JQ041774 |
| <i>Spiraea_japonica</i>        |                                      |          |           | DQ897617 |
| <i>Spiraea_prunifolia</i>      |                                      | JQ041787 |           | DQ897623 |
| <i>Spiraea_vanhouttei</i>      |                                      |          | L11206    | U16205   |
| <i>Stachyurus_chinensis</i>    |                                      | AM396501 | JF944501  | DQ307102 |
| <i>Stauntonia_hexaphylla</i>   |                                      | FJ626517 | L37922    | AY029784 |
| <i>Stephanandra_chinensis</i>  |                                      | AF288128 |           | AF487153 |
| <i>Stewartia_sinensis</i>      |                                      | AF380106 | AF380061  | AY070322 |
| <i>Styrax_calvescens</i>       |                                      |          |           | AF327468 |
| <i>Styrax_dasyanthus</i>       |                                      | HQ427280 | HQ427123  | AF327469 |

|                                   |                           |          |          |          |
|-----------------------------------|---------------------------|----------|----------|----------|
| <i>Styrax_faberi</i>              |                           |          |          | AF327484 |
| <i>Styrax_japonicus</i>           |                           |          |          | AF327465 |
| <i>Styrax_odoratissimus</i>       |                           | HQ427282 | HQ427125 | AF327460 |
| <i>Styrax_suberifolius</i>        |                           | HQ427281 | HQ427124 | AF327493 |
| <i>Styrax_wuyuanensis</i>         | added manually to ML tree |          |          |          |
| <i>Symplocos_anomala</i>          |                           | AY679808 | HQ427233 | AY336291 |
| <i>Symplocos_chinensis</i>        |                           | AY336341 |          | AF396229 |
| <i>Symplocos_heishanensis</i>     |                           |          |          | AY630642 |
| <i>Symplocos_lancifolia</i>       |                           | HQ415339 | HQ415167 | AB114887 |
| <i>Symplocos_laurina</i>          |                           | AY336368 |          | AY336318 |
| <i>Symplocos_oblongifolia</i>     | added manually to ML tree |          |          |          |
| <i>Symplocos_paniculata</i>       |                           | AF440433 | Z83139   | AY336263 |
| <i>Symplocos_phyllocalyx</i>      |                           | AY336357 |          | AY336293 |
| <i>Symplocos_setchuensis</i>      |                           | AY336359 | HQ427235 | AY336294 |
| <i>Symplocos_stellaris</i>        |                           | HQ427379 | HQ427236 | AY336329 |
| <i>Symplocos_sumuntia</i>         |                           | HQ427377 |          | AY336322 |
| <i>Syzygium_buxifolium</i>        |                           | HQ415314 | HQ427244 | EF026624 |
| <i>Tarenna_mollissima</i>         |                           | HQ415401 |          |          |
| <i>Taxodium_distichum</i>         |                           | JQ512482 | AF119185 |          |
| <i>Taxus_chinensis</i>            |                           |          | AY450856 |          |
| <i>Taxus_wallichiana</i>          |                           | HM590991 | HM591042 |          |
| <i>Ternstroemia_gymnanthera</i>   |                           | AF380109 | AF421106 | HM061522 |
| <i>Tilia_endochrysea</i>          |                           | HQ427306 | HQ427156 |          |
| <i>Toona_ciliata</i>              |                           |          |          | FJ462489 |
| <i>Toona_sinensis</i>             |                           | JN680343 | JN654542 | FJ462490 |
| <i>Torreya_grandis</i>            |                           | AF228108 | DQ478794 |          |
| <i>Toxicodendron_succedaneum</i>  |                           | HQ427343 | AY510144 | FJ945957 |
| <i>Toxicodendron_sylvestre</i>    |                           | HQ415319 | AY510145 | FJ945938 |
| <i>Toxicodendron_trichocarpum</i> |                           |          | AY510143 | FJ945927 |
| <i>Trachycarpus_fortunei</i>      |                           | HQ720315 | AY012460 |          |
| <i>Trema_cannabina</i>            | <i>Trema_micrantha</i>    | GQ982115 | AF062004 | AY635571 |
| <i>Tricalysia_dubia</i>           | <i>Diplospora_dubia</i>   | HQ427350 | HQ427201 |          |
| <i>Tutcheria_microcarpa</i>       |                           | HQ427376 | HQ427231 | AF456277 |
| <i>Ulmus_parvifolia</i>           |                           | AF345321 | D86316   |          |
| <i>Vaccinium_bracteatum</i>       |                           | AB623177 | KF569892 |          |

|                                  |                                     |          |          |          |
|----------------------------------|-------------------------------------|----------|----------|----------|
| <i>Vaccinium_carlesii</i>        |                                     |          | KF569891 |          |
| <i>Vaccinium_japonicum</i>       | syn. <i>Vaccinium_erythrocarpum</i> | AF419710 |          | AF419781 |
| <i>Vaccinium_mandarimorum</i>    | added manually to ML tree           |          |          |          |
| <i>Vernicia_fordii</i>           |                                     | GU135095 | GU135180 |          |
| <i>Vernicia_montana</i>          |                                     | AB268057 | AY794899 |          |
| <i>Viburnum_dilatatum</i>        |                                     | HQ591575 | HQ591719 | JF979005 |
| <i>Viburnum_erosum</i>           |                                     | HQ427362 | HQ427216 | JF979007 |
| <i>Viburnum_fordiæ</i>           |                                     | JF956802 | JF944784 |          |
| <i>Viburnum_plicatum</i>         |                                     | HQ591613 | HQ591754 | AY265143 |
| <i>Viburnum_propinquum</i>       |                                     | HQ591614 | HQ591755 | EF462987 |
| <i>Viburnum_sempervirens</i>     |                                     | HQ427363 | HQ427217 | HQ591976 |
| <i>Viburnum_setigerum</i>        |                                     | EF490251 | GQ248708 | HQ591977 |
| <i>Viburnum_sympodiale</i>       |                                     | HQ591630 | HQ591770 | EF462988 |
| <i>Vitex_negundo</i>             |                                     | AB284176 | JQ322525 | FM200123 |
| <i>Weigela_japonica</i>          |                                     | HQ427364 | HQ427218 | AF078716 |
| <i>Wikstroemia_indica</i>        |                                     | HQ415322 | HQ415147 |          |
| <i>Wikstroemia_monnula</i>       |                                     |          | HQ427215 |          |
| <i>Xylosma_japonica</i>          | syn. <i>Xylosma_congesta</i>        | AB233834 | AB233938 | DQ521290 |
| <i>Zanthoxylum_ailanthoides</i>  |                                     |          | FN599470 | HM851475 |
| <i>Zanthoxylum_armatum</i>       |                                     |          | GQ436751 | HM851465 |
| <i>Zanthoxylum_austrosinense</i> |                                     |          |          | HM851488 |
| <i>Zanthoxylum_simulans</i>      |                                     | EF489100 |          | HM851466 |
| <i>Zelkova_schneideriana</i>     |                                     | AF345328 |          | AJ622867 |
| <i>Zelkova_serrata</i>           |                                     |          | AF206835 | AJ622877 |

---

Table S4. Age constraints for nodes used to create the ultra-metric tree.

| Clade                     | Node defined by MRCA to                                      | Calibration type | Age [Ma] | Reference  |
|---------------------------|--------------------------------------------------------------|------------------|----------|------------|
| Seed plants               | <i>Taxodium distichum</i> - <i>Abutilon theophrasti</i>      | max              | 385      | [8]        |
| Gymnosperms               | <i>Pseudolarix kaempferi</i> - <i>Taxodium distichum</i>     | min              | 318      | [9]        |
| Cupressaceae              | <i>Cunninghamia lanceolata</i> - <i>Taxodium distichum</i>   | min              | 90       | [10]       |
| Pinaceae                  | <i>Pseudolarix kaempferi</i> - <i>Pinus massoniana</i>       | min              | 90       | [11]       |
| Angiosperms               | <i>Pleioblastus amarus</i> - <i>Abutilon theophrasti</i>     | max              | 130      | [12,13]    |
| Laurales                  | <i>Chimonanthus salicifolius</i> - <i>Litsea cubeba</i>      | min              | 108.8    | [14]       |
| Eudicots                  | <i>Holboellia coriacea</i> - <i>Abutilon theophrasti</i>     | fixed            | 125      | [15]       |
| Ranunculales              | <i>Holboellia coriacea</i> - <i>Mahonia bealei</i>           | min              | 91       | [16]       |
| Berberidaceae             | <i>Berberis soulieana</i> - <i>Mahonia bealei</i>            | min              | 33.9     | [17]       |
| Hamamelidaceae            | <i>Liquidambar acalycina</i> - <i>Corylopsis sinensis</i>    | min              | 83.5     | [18,19]    |
| Fabales                   | <i>Polygala arillata</i> - <i>Albizia kalkora</i>            | min              | 60       | [20]       |
| Malpighiales              | <i>Vernicia fordii</i> - <i>Phyllanthus urinaria</i>         | min              | 89.3     | [21]       |
| Salicaceae                | <i>Idesia polycarpa</i> - <i>Populus adenopoda</i>           | min              | 48       | [22]       |
| Fagales                   | <i>Quercus serrata</i> - <i>Juglans cathayensis</i>          | min              | 93.5     | [23,24,25] |
| Juglandaceae              | <i>Cyclocarya paliurus</i> - <i>Juglans cathayensis</i>      | min              | 55.8     | [26]       |
| Rosaceae                  | <i>Rosa cymosa</i> - <i>Prunus pseudocerasus</i>             | min              | 37.2     | [17]       |
| Ulmaceae                  | <i>Ulmus parvifolia</i> - <i>Zelkova schneideriana</i>       | min              | 33.9     | [17]       |
| Rutaceae-Meliaceae        | <i>Melia azedarach</i> - <i>Skimmia japonica</i>             | min              | 50       | [27]       |
| Myrtales                  | <i>Melastoma dodecandrum</i> - <i>Syzygium buxifolium</i>    | min              | 60       | [28]       |
| Ericales                  | <i>Actinidia melanandra</i> - <i>Ardisia crenata</i>         | min              | 89.6     | [29]       |
| Actinidiaceae (stem node) | <i>Actinidia melanandra</i> - <i>Rhododendron latoucheae</i> | min              | 77.05    | [30]       |
| Cornaceae                 | <i>Alangium kurzii</i> - <i>Cornus kousa</i>                 | min              | 55.8     | [17]       |
| Nyssaceae                 | <i>Camptotheca acuminata</i> - <i>Nyssa sinensis</i>         | min              | 33.9     | [17]       |
| Hydrangeaceae             | <i>Deutzia glauca</i> - <i>Hydrangea strigosa</i>            | min              | 37.2     | [17]       |
| Cornales                  | <i>Camptotheca acuminata</i> - <i>Cornus kousa</i>           | min              | 89       | [30]       |
| Oleaceae                  | <i>Osmanthus matsumuranus</i> - <i>Fraxinus chinensis</i>    | min              | 33.9     | [17]       |
| Dipsacales                | <i>Viburnum sympodiale</i> - <i>Lonicera modesta</i>         | min              | 33.9     | [31]       |
| Apiales                   | <i>Pittosporum illicioides</i> - <i>Dendropanax dentiger</i> | min              | 37.2     | [17]       |

## References

1. Lou LH, Li GY (1998) List of seed plants in Gutianshan.
2. Fazekas AJ, Kuzmina ML, Newmaster SG, Hollingsworth PM (2012) DNA Barcoding Methods for Land Plants In: Kress WJ, Erickson DL, editors. DNA Barcodes: Methods and protocols. New York: Humana Press. pp. 223-252.
3. Katoh K, Misawa K, Kuma Ki, Miyata T (2002) MAFFT: a novel method for rapid multiple sequence alignment based on fast Fourier transform. *Nucleic Acids Research* 30: 3059-3066.
4. Kumar S, Skjaeveland A, Orr R, Enger P, Ruden T, et al. (2009) AIR: A batch-oriented web program package for construction of supermatrices ready for phylogenomic analyses. *BMC Bioinformatics* 10: 357.
5. Guindon S, Gascuel O (2003) A Simple, Fast, and Accurate Algorithm to Estimate Large Phylogenies by Maximum Likelihood. *Syst Biol* 52: 696-704.
6. Posada D, Crandall KA (1998) MODELTEST: testing the model of DNA substitution. *Bioinformatics* 14: 817-818.
7. Sanderson MJ (1997) A nonparametric approach to estimating divergence times in the absence of rate constancy. *Molecular Biology and Evolution* 14: 1218-1231.
8. Gerrienne P, Meyer-Berthaud B, Fairon-Demaret M, StreeL M, Steemans P (2004) Runcaria, a Middle Devonian Seed Plant Precursor. *Science* 306: 856-858.
9. Renner S (2009) Gymnosperms. In: Hedges SB, Kumar S, editors. *The Timetree of Life*. Oxford: Oxford University Press. pp. 157-160.
10. LePage BA (2003) The evolution, biogeography and palaeoecology of the Pinaceae based on fossil and extant representatives. *Acta Horticulturae (ISHS)* 615: 29-52.
11. Gandolfo MA, Nixon KC, Crepet WL (2001) Turonian Pinaceae of the Raritan Formation, New Jersey. *Plant Systematics and Evolution* 226: 187-203.
12. Hughes NF, McDougall AB, Chapman JL (1991) Exceptional new record of Cretaceous Hauterivian angiospermid pollen from Southern England. *Journal of Micropalaeontology* 10: 75-82.
13. Hughes NF, McDougall AB (1987) Records of angiospermid pollen entry into the English early Cretaceous succession. *Review of Palaeobotany and Palynology* 50: 255-272.
14. Crane PR, Friis EM, Pedersen KR (1994) Palaeobotanical evidence on the early radiation of magnoliid angiosperms. *Plant Systematics and Evolution Supplement* 8: 51-72.
15. Hughes NF, McDougall AB (1990) Barremian-Aptian angiospermid pollen records from southern England. *Review of Palaeobotany and Palynology* 65: 145-151.
16. Knobloch E, Mai DH (1986) *Monographie der Früchte und Samen in der Kreide von Mitteleuropa*. Praha. 1-219 p.
17. Manchester SR (1999) Biogeographical relationships of North American tertiary floras. *Annals of the Missouri Botanical Garden* 86: 472-522.
18. Magallon-Puebla S, Herendeen PS, Endress PK (1996) *Allonia decandra*: Floral remains of the tribe *Hamamelideae* (Hamamelidaceae) from Campanian strata of southeastern USA. *Plant Systematics and Evolution* 202: 177-198.
19. Magallón S, Herendeen PS, Crane P (2001) *Androdecidua endressii* gen. et sp. nov., from the Late Cretaceous of Georgia (United States): Further Floral Diversity in Hamamelidoideae (Hamamelidaceae). *International Journal of Plant Sciences* 162: 963-983.

20. Lavin M, Herendeen PS, Wojciechowski MF (2005) Evolutionary rates analysis of Leguminosae implicates a rapid diversification of lineages during the Tertiary. *Systematic Biology* 54: 575-594.
21. Crepet WL, Nixon KC (1998) Fossil Clusiaceae from the Late Cretaceous (Turonian) of New Jersey and implications regarding the history of bee pollination. *American Journal of Botany* 85: 1122-1133.
22. Boucher LD, Manchester SR, Judd WS (2003) An extinct genus of Salicaceae based on twigs with attached flowers, fruits, and foliage from the Eocene Green River Formation of Utah and Colorado, USA. *American Journal of Botany* 90: 1389-1399.
23. Batten DJ (1981) Stratigraphic, palaeogeographic and evolutionary significance of late cretaceous and early tertiary normapolles pollen. *Review of Palaeobotany and Palynology* 35: 125-137.
24. Kedves M (1989) Evolution of the Normapolles complex. In: Crane PR, Blackmore S, editors. *Evolution, Systematics, and Fossil History of the Hamamelidae*, 1-7 Systematics Association Special Volume, vol 40B. Oxford: Clarendon Press.
25. Pacltová B (1966) Pollen grains of angiosperms in the Cenomanian Peruc Formation in Bohemia. *Palaeobotanist* 15: 52-54.
26. Crane PR, Manchester SR, Dilcher DL (1990) A preliminary survey of fossil leaves and well-preserved reproductive structures from the Sentinel Butte Formation (Paleocene) near Almont, North Dakota. *Fieldiana Geology* 20: 1-63.
27. Corbett SL, Manchester SR (2004) Phytogeography and fossil history of *Ailanthus* (Simaroubaceae). *International Journal of Plant Sciences* 165: 671-690.
28. Pigg KB, Stockey RA, Maxwell SL (1993) *Paleomyrtinaea*, a new genus of permineralized myrtaceous fruits and seeds from the Eocene of British Columbia and Paleocene of North Dakota. *Canadian Journal of Botany* 71: 1-9.
29. Nixon KC, Crepet WL (1993) Late Cretaceous fossil flowers of ericalean affinity. *American Journal of Botany* 80: 616-623.
30. Schenk JJ, Hufford L (2010) Effects of substitution models on divergence time estimates: Simulations and an empirical study of model uncertainty using Cornales. *Systematic Botany* 35: 578-592.
31. Manchester SR, Donoghue MJ (1995) Winged fruits of Linnaeae (Caprifoliaceae) in the Tertiary of Western North America: *Diplodipelta* gen. nov. *International Journal of Plant Sciences* 156: 709-722.

Fig. S3. Structural equation models fitting total stem basal area in 2008 (a, c) and the increment of total stem basal area from 2008–2010 (b, d) in dependence of successional age, tree diversity, and tree stem density. In contrast to the path diagrams presented in Fig. 2, these models explore the possibility that variations in tree density occur independently of diversity and successional age. In particular, they do not allow for density-mediated effects of tree diversity on stand-level growth. In the light that studies controlling initial density have shown that this pathway can dominate system-level responses, the true diversity effects may be underestimated in this approach. Nevertheless, size-mediated effects of diversity remained strong and significant for stand-level basal area growth, and marginally significant for stand-level basal area of the canopy tree cohort. The diagrams show standardized path coefficients (red: positive; blue: negative) and associated statistical significances (\*\*\*  $P < 0.001$ ; \*\*  $P < 0.01$ ; \*  $P < 0.05$ ; (\*)  $P < 0.1$ ). Variable abbreviations: S = species richness, PD = phylogenetic diversity, FD = functional diversity, DIV = diversity (latent variable related to previous three), AGE = successional age, DENS = tree density, BA = total stem basal area,  $\Delta$ BA = increment of total stem basal area.



Canopy ( $d \geq 10\text{cm}$ )

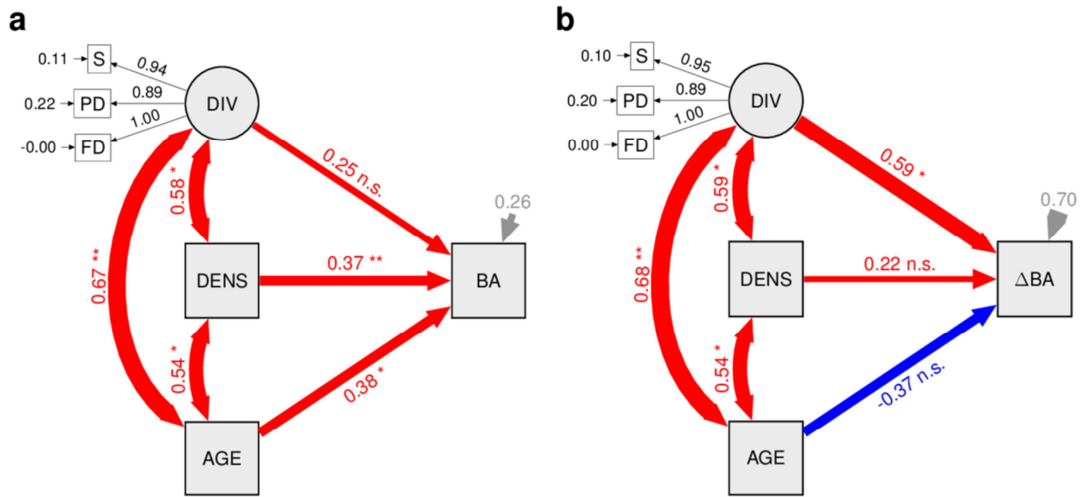

Understory ( $3\text{cm} \leq d < 10\text{cm}$ )

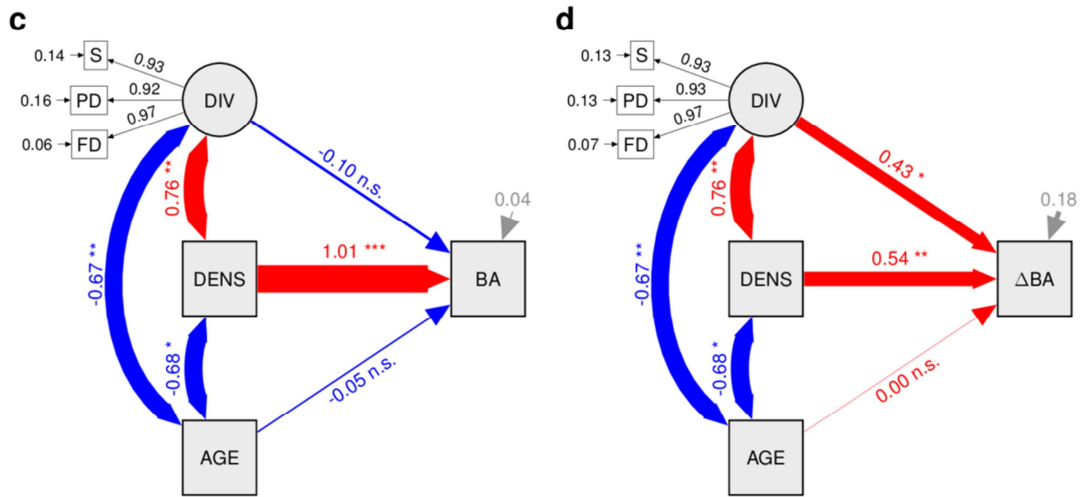

Supplement: pone.0081246.s001.pdf [file pone.0081246.s001.pdf]
